# Supplementary material
Source: PubMed Central journal article supplement (PMC4060701)

## Supplementary Figure Legends

**Figure S1** Clinical diagnosis, insulin and glucagon positivity of PanNET samples used in the study.

The numbers of insulin- or glucagon-positive tumors (including partially positive tumors) with or without *PHLDA3* LOH were counted, and analyzed by Fisher's exact test (B, C).

NF; non-functional PanNET. ND; no data.

**Figure S2** Analysis of the genomic sequence of the *PHLDA3* gene within the ORF region.

We used 4 primers (3-seq: gcc cgc atc aag gcc gtg, 4-seq: ggg tag cat gaa gga aag atg, 5-seq: gcc gca gcc tgg agc ttt c, 6-seq: ctt cgg tca cca gcg tga ag) to determine the genomic sequence of the ORF region of the *PHLDA3* gene. Genomic DNAs from PanNET patients were PCR amplified using primers 3-seq and 4-seq, or 5-seq and 6-seq. Subsequently, the PCR products were directly sequenced.

**Figure S3** 5-aza-C treatment of MIN6 cells, a mouse PanNET cell line.

(A) *PHLDA3* protein levels were analyzed by Western blotting.

(B) Total RNAs were isolated, and *PHLDA3* mRNA levels were analyzed as in Fig. 8A.

**Figure S4** Methylation status of *PHLDA3* promoter in PanNETs (samples without LOH at the *PHLDA3* locus was analyzed). Genomic DNAs were prepared and analyzed as described in Fig. 4G.

**Figure S5** Effect of *PHLDA3* expression on Akt activity and phosphorylation of Akt downstream signaling molecules in *PHLDA3* <sup>-/-</sup> MEFs.

*PHLDA3* <sup>-/-</sup> MEFs were transduced with Ad-LacZ or Ad-*PHLDA3* at a moi of 60. Cells were harvested 36 hrs post-infection. Akt activation, phosphorylation of Akt downstream signaling molecules were analyzed by Western blotting and quantified by normalization to total Akt levels (P-Akt) or by  $\beta$ -actin levels (P-p70 S6K, P-Mdm2). *PHLDA3* expression was detected by anti-HA antibody.

**Figure S6** PHLDA3 protein levels in isolated rat islets.

PHLDA3 protein levels were determined by Western blotting, using isolated rat islets subjected to  $\gamma$ -ray irradiation (20 Gy) or left untreated.

**Figure S7** Calculation of islet sizes of 3-month-old (12- to 13-week-old) mice.

Indicated numbers of mice were analyzed. Size distributions of islets (A) and average islet sizes (B) are shown.

**Figure S8** Immunohistochemical staining of pancreas sections from 10-month-old *PHLDA3* +/+ and -/- mice. Sections were stained with antibody against Ki67 and counter-stained with hematoxylin. Representative images are shown.

**Figure S9** Blood glucose and plasma insulin levels in *PHLDA3*-deficient mice.

(A) Body weights, plasma insulin levels and blood glucose levels were analyzed using the indicated numbers (n) of 6-month-old *PHLDA3* +/+ and -/- mice. Plasma insulin levels and blood glucose levels were determined in blood taken from tail vein samples. Mice were fed ad libitum. Data are presented as mean  $\pm$  SEM. (\*\*,  $p < 0.01$ )

(B) Indicated numbers (n) of overnight-fasted 10-month-old mice were subjected to the same analysis. Plasma insulin levels were determined in blood from the inferior vena cava. Blood glucose levels were determined in blood from tail vein samples. (\*,  $p < 0.05$ )

**Figure S10** Chromogranin A levels in islets of *PHLDA3* +/+ and -/- mice.

Pancreas sections from 10-month-old *PHLDA3* +/+ and -/- mice were stained with antibody against Chromogranin A. Representative images are shown (A). Chromogranin A expression levels were analyzed quantitatively in 5 or 10 semi-hyperplastic islets and hyperplastic islets (larger than 0.05 mm<sup>2</sup> islet area) using TissueFAXS (B). Data are presented as mean  $\pm$  SEM.

**Figure S11** Glut2 expression and localization in islets of *PHLDA3* +/+ and -/- mice.

Pancreas sections from 10-month-old *PHLDA3* +/+ and -/- mice were stained with antibody against Glut2. Representative images are shown (A; *PHLDA3* +/+ islet, B; -/- islet, C; -/- hyperplastic islet). Glut2 expression levels in 3 representative islet cells

were quantitated from line-profile fluorescence intensities in images obtained with a Keyence BZ-9000 fluorescence microscope.

**Figure S12** Detection of IAPP (islet amyloid polypeptide) deposits in islets of *PHLDA3* +/+ and -/- mice.

Pancreas sections from 10-month-old *PHLDA3* +/+ and -/- mice were stained with Congo red and counter-stained with HE. Representative images are shown. A small section of the intestine of an amyloidosis patient is shown as a positive control for amyloid deposits. Deposited amyloid exhibits a typical green birefringence in polarized light, as is seen in the amyloidosis patient.

**A**

|          | tumor type             | insulin       | glucaon       | PHLDA3 LOH |
|----------|------------------------|---------------|---------------|------------|
| PanNET1  | NF                     | -             | -             | +          |
| PanNET2  | NF                     | + (partially) | + (partially) | +          |
| PanNET3  | NF                     | -             | -             | +          |
| PanNET4  | NF                     | ND            | ND            | +          |
| PanNET5  | NF                     | + (partially) | -             | +          |
| PanNET6  | NF                     | ND            | ND            | +          |
| PanNET7  | NF                     | + (partially) | + (partially) | +          |
| PanNET8  | NF                     | -             | -             | +          |
| PanNET9  | NF                     | ND            | ND            | +          |
| PanNET10 | NF                     | + (partially) | + (partially) | +          |
| PanNET11 | NF                     | -             | -             | +          |
| PanNET12 | NF                     | -             | -             | +          |
| PanNET13 | NF                     | -             | -             | +          |
| PanNET14 | NF                     | -             | + (partially) | +          |
| PanNET15 | NF                     | + (partially) | + (partially) | +          |
| PanNET16 | NF                     | -             | -             | -          |
| PanNET17 | NF                     | + (partially) | -             | -          |
| PanNET18 | NF                     | + (partially) | + (partially) | -          |
| PanNET19 | NF                     | ND            | ND            | +          |
| PanNET20 | NF                     | +             | -             | +          |
| PanNET21 | NF                     | + (partially) | + (partially) | +          |
| PanNET22 | NF                     | ND            | ND            | +          |
| PanNET23 | insulinoma             | +             | -             | +          |
| PanNET24 | NF                     | ND            | ND            | +          |
| PanNET25 | NF                     | -             | -             | +          |
| PanNET26 | NF                     | ND            | ND            | +          |
| PanNET27 | NF                     | + (partially) | -             | +          |
| PanNET28 | NF                     | + (partially) | -             | +          |
| PanNET29 | NF                     | ND            | ND            | +          |
| PanNET30 | NF                     | ND            | ND            | +          |
| PanNET31 | NF                     | -             | + (partially) | +          |
| PanNET32 | NF                     | -             | + (partially) | +          |
| PanNET33 | NF                     | -             | -             | +          |
| PanNET34 | NF                     | -             | -             | +          |
| PanNET35 | NF                     | -             | + (partially) | +          |
| PanNET36 | NF                     | -             | + (partially) | +          |
| PanNET37 | NF                     | -             | -             | +          |
| PanNET38 | NF                     | + (partially) | + (partially) | +          |
| PanNET39 | NF                     | -             | -             | +          |
| PanNET40 | NF                     | -             | -             | -          |
| PanNET41 | NF                     | + (partially) | + (partially) | -          |
| PanNET42 | NF                     | + (partially) | -             | -          |
| PanNET43 | NF                     | -             | + (partially) | -          |
| PanNET44 | NF                     | -             | + (partially) | -          |
| PanNET45 | NF                     | -             | + (partially) | -          |
| PanNET46 | NF                     | -             | -             | -          |
| PanNET47 | NF                     | -             | + (partially) | -          |
| PanNET48 | NF                     | -             | -             | -          |
| PanNET49 | NF                     | -             | +             | -          |
| PanNET50 | insulinoma             | +             | -             | -          |
| PanNET51 | NF                     | ND            | ND            | ND         |
| PanNET52 | NF                     | -             | -             | ND         |
| PanNET53 | NF                     | -             | +             | ND         |
| PanNET54 | insulinoma, gastrinoma | +             | +             | ND         |

**B**

|      | ins+      | ins-      |
|------|-----------|-----------|
| LOH+ | 11 (41 %) | 16 (59 %) |
| LOH- | 5 (36 %)  | 9 (64 %)  |

(Fisher's exact test, p=1)

**C**

|      | glu+      | glu-      |
|------|-----------|-----------|
| LOH+ | 11 (41 %) | 16 (59 %) |
| LOH- | 7 (50 %)  | 7 (50 %)  |

(Fisher's exact test, p=0.74)

Ohki\_Fig.S2

| 3-seq | 4-seq | 5-seq | 6-seq |          |
|-------|-------|-------|-------|----------|
|       |       |       |       | PanNET1  |
|       |       |       |       | PanNET2  |
|       |       |       |       | PanNET3  |
|       |       |       |       | PanNET4  |
|       |       |       |       | PanNET5  |
|       |       |       |       | PanNET6  |
|       |       |       |       | PanNET7  |
|       |       |       |       | PanNET8  |
|       |       |       |       | PanNET9  |
|       |       |       |       | PanNET10 |
|       |       |       |       | PanNET11 |
|       |       |       |       | PanNET12 |
|       |       |       |       | PanNET13 |
|       |       |       |       | PanNET14 |
|       |       |       |       | PanNET15 |
|       |       |       |       | PanNET16 |
|       |       |       |       | PanNET17 |
|       |       |       |       | PanNET18 |
|       |       |       |       | PanNET19 |
|       |       |       |       | PanNET20 |
|       |       |       |       | PanNET21 |
|       |       |       |       | PanNET22 |
|       |       |       |       | PanNET23 |
|       |       |       |       | PanNET24 |
|       |       |       |       | PanNET25 |
|       |       |       |       | PanNET26 |
|       |       |       |       | PanNET27 |
|       |       |       |       | PanNET28 |
|       |       |       |       | PanNET29 |
|       |       |       |       | PanNET30 |
|       |       |       |       | PanNET31 |
|       |       |       |       | PanNET32 |
|       |       |       |       | PanNET33 |
|       |       |       |       | PanNET34 |
|       |       |       |       | PanNET35 |
|       |       |       |       | PanNET36 |
|       |       |       |       | PanNET37 |
|       |       |       |       | PanNET38 |
|       |       |       |       | PanNET39 |
|       |       |       |       | PanNET40 |
|       |       |       |       | PanNET41 |
|       |       |       |       | PanNET42 |
|       |       |       |       | PanNET43 |
|       |       |       |       | PanNET44 |
|       |       |       |       | PanNET45 |
|       |       |       |       | PanNET46 |
|       |       |       |       | PanNET47 |
|       |       |       |       | PanNET48 |
|       |       |       |       | PanNET49 |
|       |       |       |       | PanNET50 |
|       |       |       |       | PanNET51 |
|       |       |       |       | PanNET52 |
|       |       |       |       | PanNET53 |
|       |       |       |       | PanNET54 |

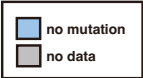

**A**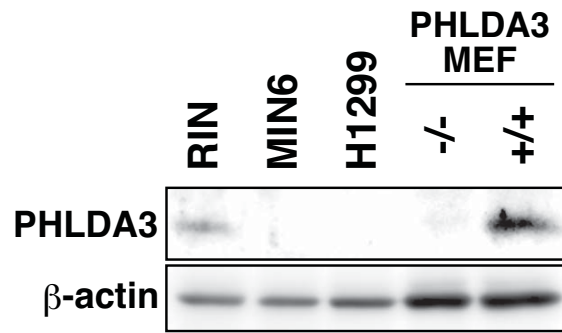**B**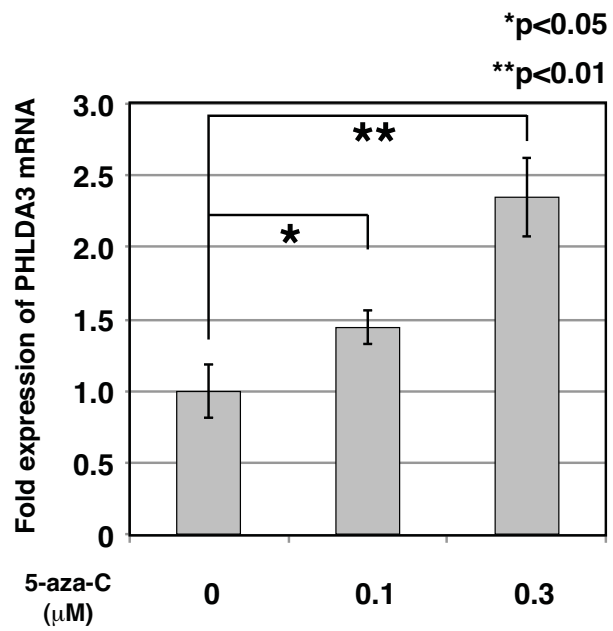

Ohki\_Fig.S4

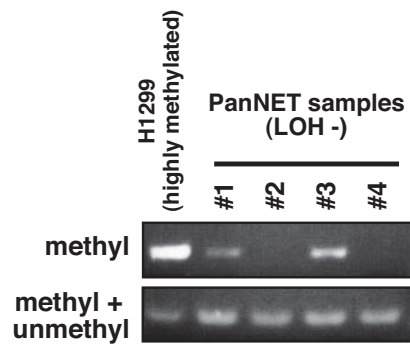

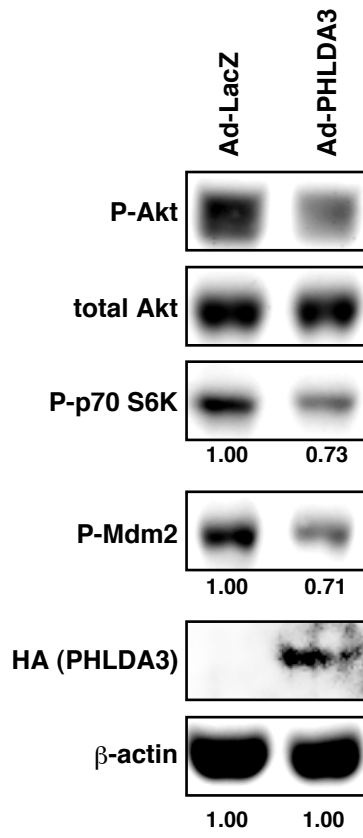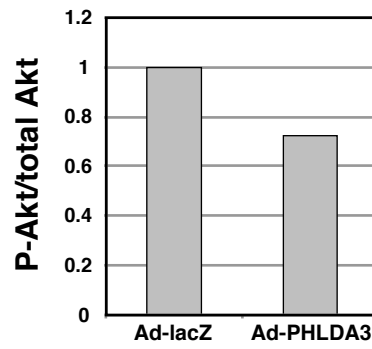



Ohki\_Fig.S6

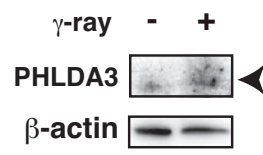

**A**

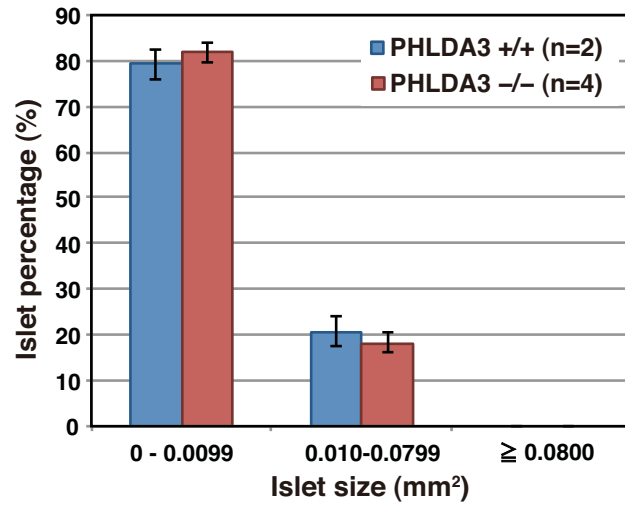

**B**

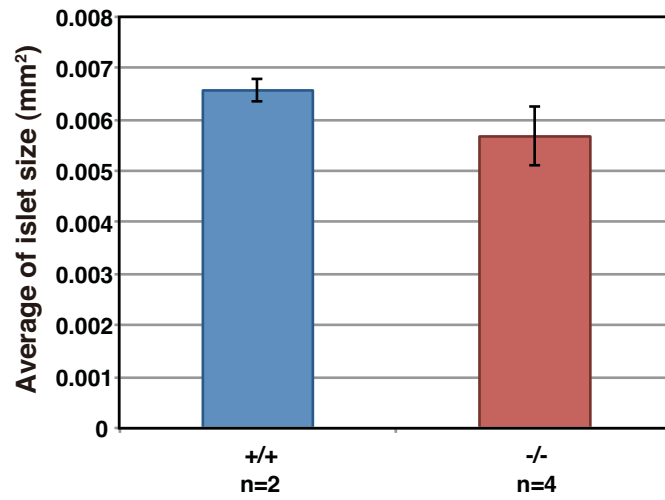

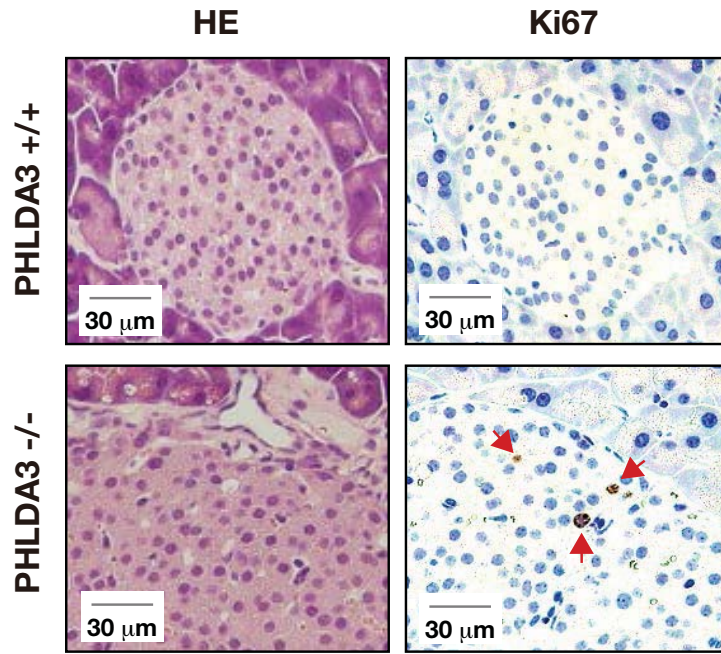

**A**

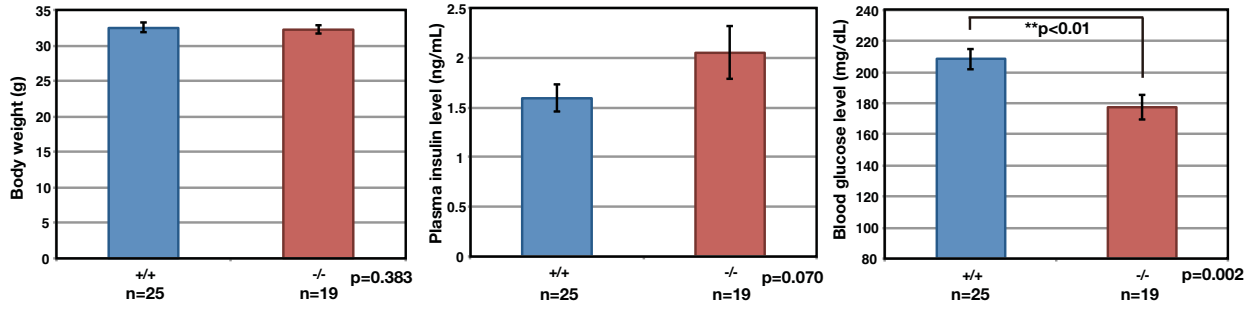

**B**

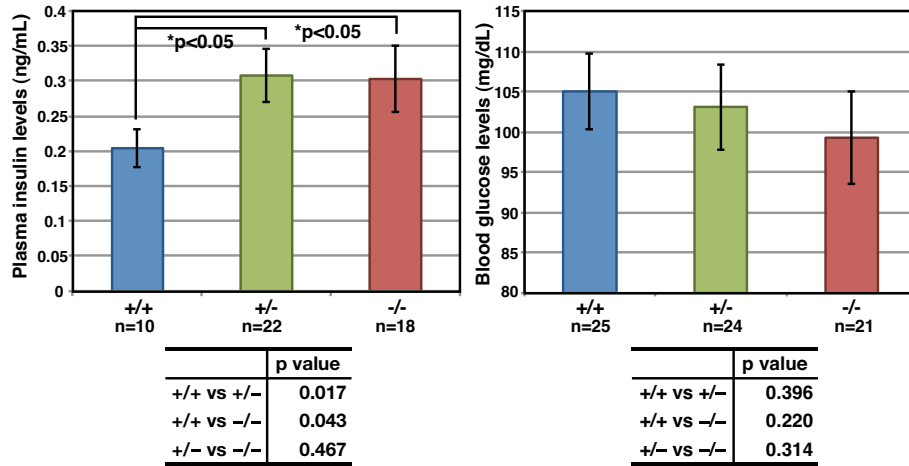

**A**

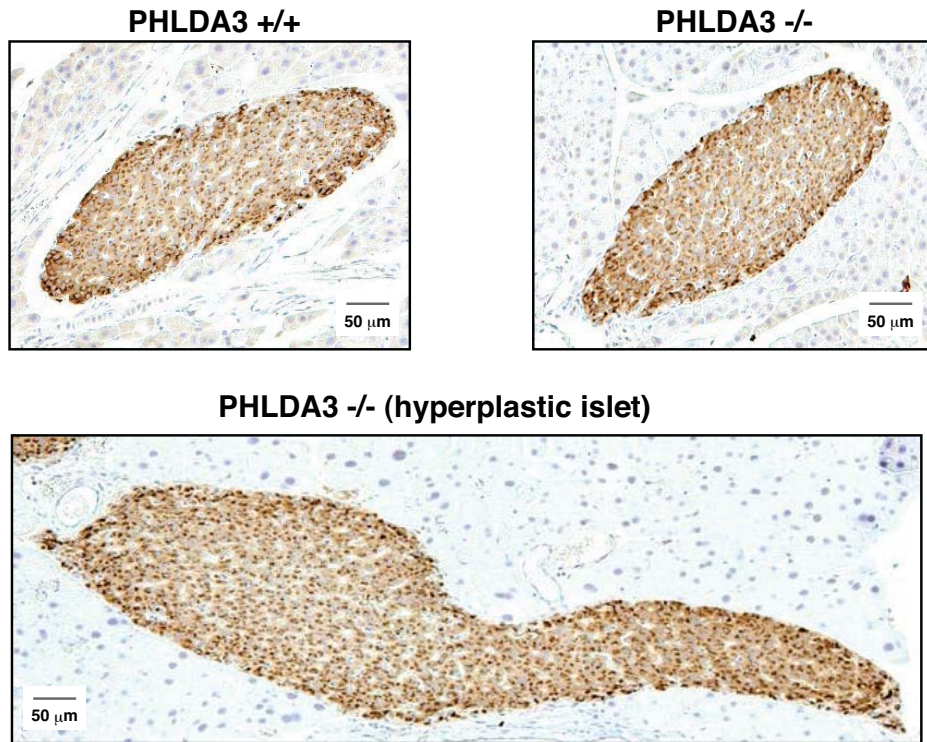

**B**

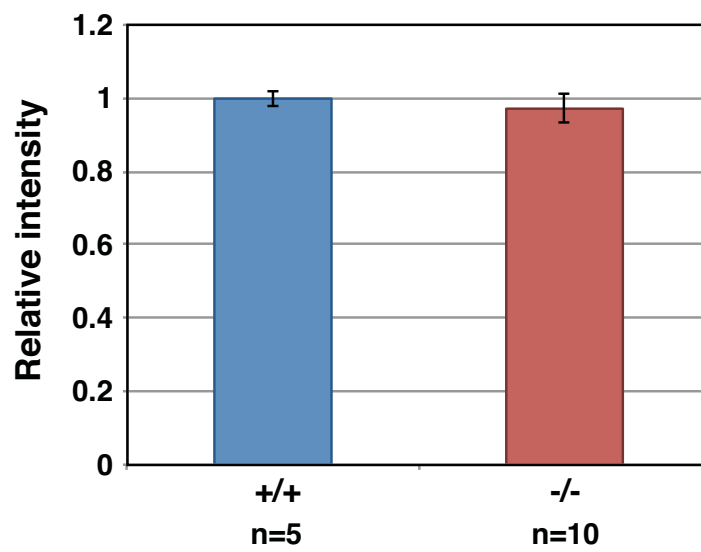

**A**

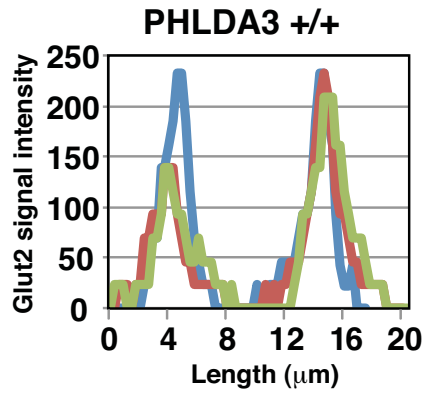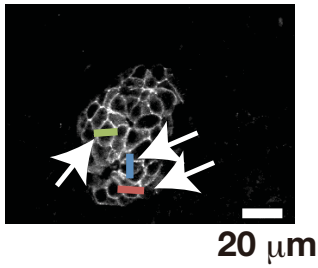

**B**

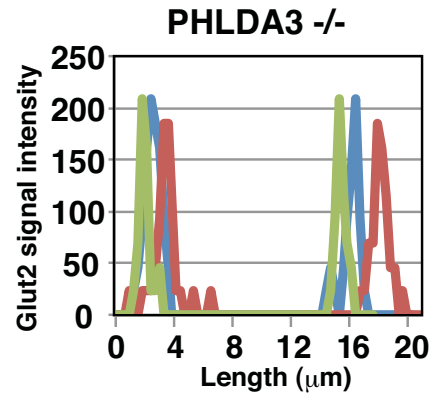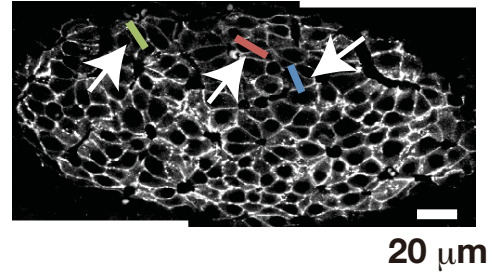

**C**

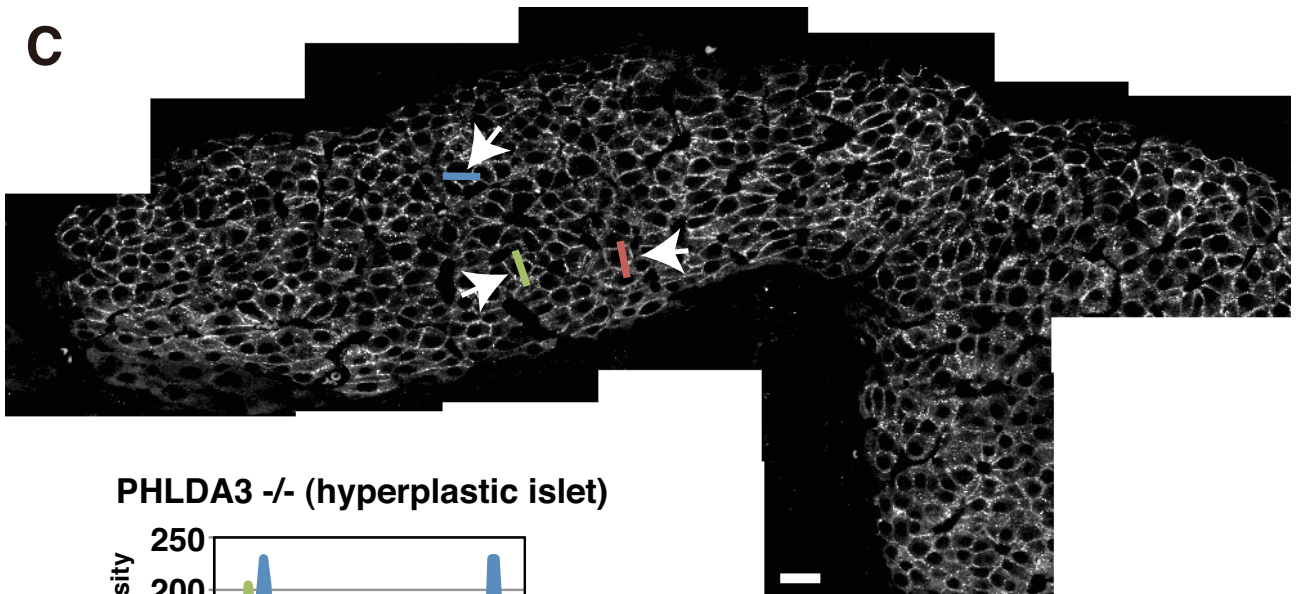

**PHLDA3 -/- (hyperplastic islet)**

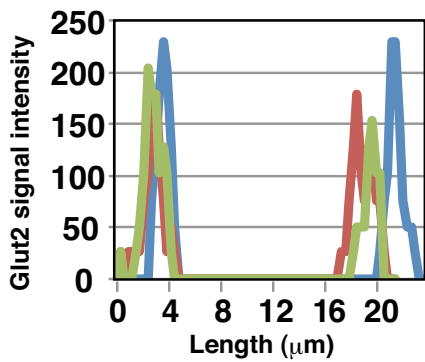

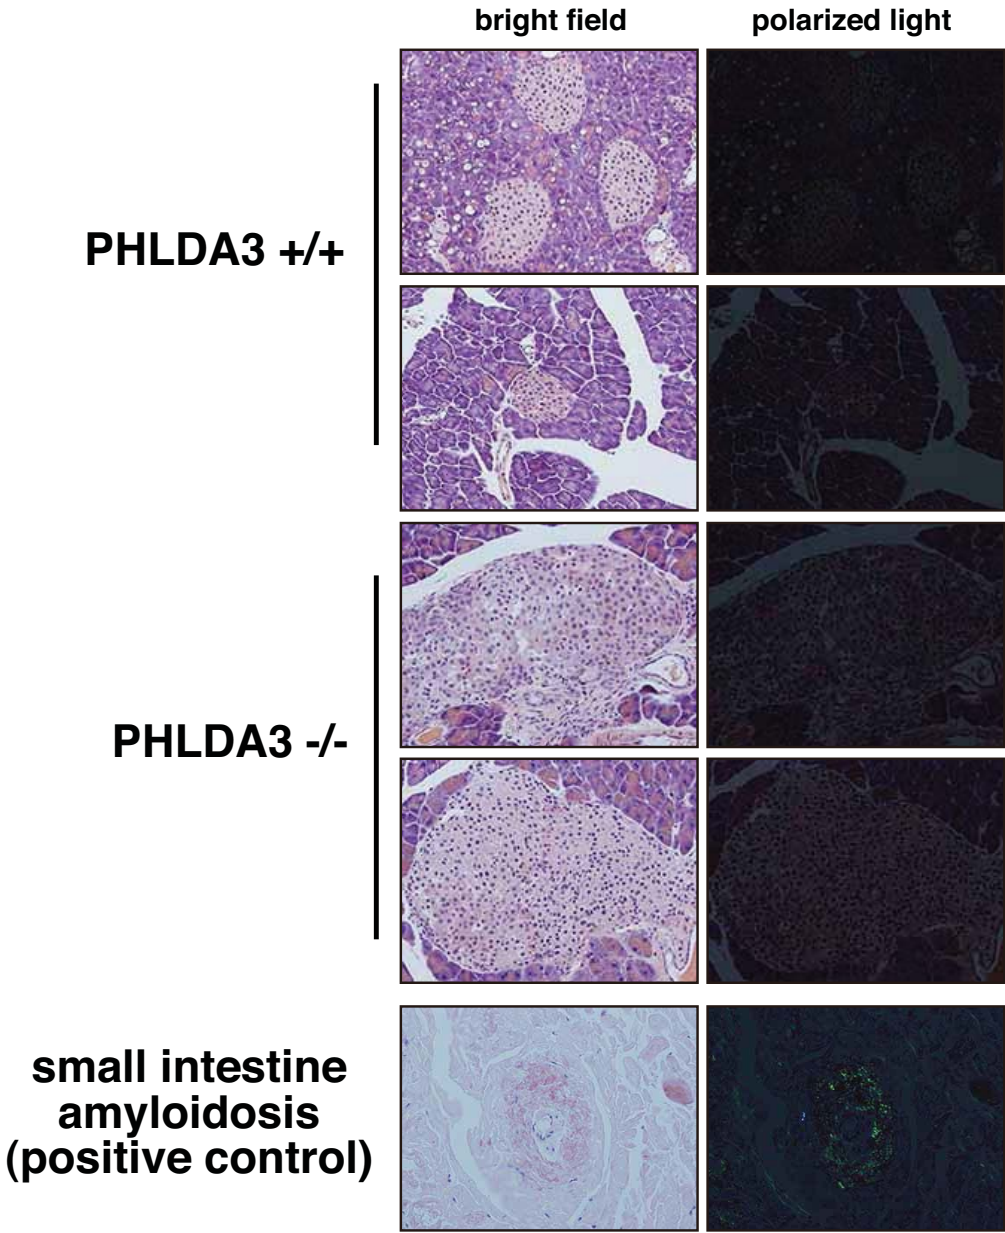

Supplement: 1319962111_pnas.1319962111.sapp.pdf [file 1319962111_pnas.1319962111.sapp.pdf]
